# Supplementary material
Source: PubMed Central journal article supplement (PMC5575746)
Supplement: NIHMS895968-supplement-Supplement.pdf [file NIHMS895968-supplement-Supplement.pdf]

**Heart**

## Acute and recent air pollution exposure and cardiovascular events at labour and delivery

Tuija Männistö, Pauline Mendola, Katherine Laughon Grantz, Kira Leishear, Rajeshwari Sundaram, Seth Sherman, Qi Ying and Danping Liu

*Heart* 2015 101: 1491-1498 originally published online June 23, 2015  
doi: 10.1136/heartjnl-2014-307366

---

Updated information and services can be found at:  
<http://heart.bmj.com/content/101/18/1491>

---

*These include:*

### Supplementary Material

Supplementary material can be found at:  
<http://heart.bmj.com/content/suppl/2015/06/23/heartjnl-2014-307366.DC1.html>

### References

This article cites 27 articles, 9 of which you can access for free at:  
<http://heart.bmj.com/content/101/18/1491#BIBL>

### Email alerting service

Receive free email alerts when new articles cite this article. Sign up in the box at the top right corner of the online article.

---

### Topic Collections

Articles on similar topics can be found in the following collections

[Drugs: cardiovascular system](#) (8424)  
[Acute coronary syndromes](#) (2615)

---

### Notes

---

To request permissions go to:  
<http://group.bmj.com/group/rights-licensing/permissions>

To order reprints go to:  
<http://journals.bmj.com/cgi/reprintform>

To subscribe to BMJ go to:  
<http://group.bmj.com/subscribe/>

Supplemental Table 1. The discharge diagnosis codes used to identify maternal cardiovascular events at labor/delivery.

| Outcome                                                                                                       | International Classification of Diseases, version 9 code |
|---------------------------------------------------------------------------------------------------------------|----------------------------------------------------------|
| Ischemic heart disease                                                                                        |                                                          |
| Acute myocardial infarction                                                                                   | 410                                                      |
| Other acute and subacute forms of ischemic heart disease                                                      | 411                                                      |
| Angina pectoris                                                                                               | 413                                                      |
| Certain sequelae of myocardial infarction, not elsewhere classified                                           | 429.7                                                    |
| Stroke                                                                                                        |                                                          |
| Subarachnoid hemorrhage                                                                                       | 430                                                      |
| Intracerebral hemorrhage                                                                                      | 431                                                      |
| Other and unspecified intracranial hemorrhage                                                                 | 432                                                      |
| Occlusion and stenosis of precerebral arteries                                                                | 433                                                      |
| Occlusion of cerebral arteries                                                                                | 434                                                      |
| Transient cerebral ischemia                                                                                   | 435                                                      |
| Acute, but ill-defined cerebrovascular disease                                                                | 436                                                      |
| Cerebrovascular disorder in the puerperium                                                                    | 674.0                                                    |
| Complications of the administration of anesthetic or other sedation in labor and delivery –                   | 668.2                                                    |
| Central nervous system complications                                                                          |                                                          |
| Complications affecting specified body systems, not elsewhere classified – Other nervous system complications | 997.09                                                   |
| Heart failure                                                                                                 | 428                                                      |
| Cardiac arrest/failure                                                                                        |                                                          |
| Cardiac arrest                                                                                                | 427.5                                                    |
| Complications of the administration of anesthetic or other sedation in labor and delivery –                   | 668.1                                                    |
| Cardiac complications                                                                                         |                                                          |
| Other complications of obstetrical surgery and procedures                                                     | 669.4                                                    |
| Complications affecting specified body systems, not elsewhere classified – Cardiac complications              | 997.1                                                    |
| Unspecified cardiovascular events                                                                             |                                                          |
| Other cardiovascular diseases with postpartum complication                                                    | 648.62 and 648.64                                        |

Supplemental Table 2. The concentrations of criteria pollutants in the week prior to delivery in the Consortium on Safe Labor.<sup>a</sup>

|                    | Lag (days)                      |                                 |                                 |                                 |                                 |                                 |                                 |                                 |
|--------------------|---------------------------------|---------------------------------|---------------------------------|---------------------------------|---------------------------------|---------------------------------|---------------------------------|---------------------------------|
|                    | 0                               | 1                               | 2                               | 3                               | 4                               | 5                               | 6                               | 7                               |
| PM <sub>10</sub>   | 21.0 (0.0-98.7)<br>[14.0]       | 21.0 (0.0-98.7)<br>[14.0]       | 20.8 (0.0-98.7)<br>[13.9]       | 20.7 (0.0-98.7)<br>[13.8]       | 20.7 (0.0-98.7)<br>[13.8]       | 20.8 (0.0-98.7)<br>[13.8]       | 20.9 (0.0-98.7)<br>[14.0]       | 21.0 (0.0-98.7)<br>[14.0]       |
| PM <sub>2.5</sub>  | 9.9 (0.0-63.9)<br>[9.1]         | 9.9 (0.0-63.9)<br>[9.0]         | 9.9 (0.0-63.9)<br>[9.0]         | 9.9 (0.0-63.9)<br>[8.9]         | 9.9 (0.0-63.9)<br>[8.9]         | 9.9 (0.0-63.9)<br>[8.9]         | 10.0 (0.0-63.9)<br>[9.0]        | 9.9 (0.0-63.9)<br>[9.1]         |
| Ozone              | 29.7 (0.2-79.8)<br>[17.9]       | 29.8 (0.2-79.8)<br>[17.8]       | 29.9 (0.2-79.8)<br>[17.8]       | 29.9 (0.2-79.8)<br>[17.7]       | 29.9 (0.2-79.8)<br>[17.7]       | 29.9 (0.2-79.8)<br>[17.7]       | 29.8 (0.2-79.8)<br>[17.8]       | 29.7 (0.2-79.8)<br>[17.8]       |
| CO                 | 481.7 (82.4-<br>2694.2) [297.6] | 481.3 (82.4-<br>2694.2) [297.7] | 479.1 (82.4-<br>2694.2) [296.8] | 478.0 (82.4-<br>2694.2) [296.1] | 478.9 (82.4-<br>2694.2) [296.2] | 479.4 (82.4-<br>2694.2) [295.6] | 481.4 (82.4-<br>2694.2) [296.9] | 482.2 (82.4-<br>2694.2) [298.5] |
| NO <sub>x</sub>    | 19.6 (1.8-255.7)<br>[27.8]      | 19.3 (1.8-255.7)<br>[27.9]      | 19.0 (1.8-255.7)<br>[27.3]      | 18.8 (1.8-255.7)<br>[27.0]      | 18.9 (1.8-255.7)<br>[27.1]      | 19.0 (1.8-255.7)<br>[27.2]      | 19.3 (1.8-255.7)<br>[27.8]      | 19.6 (1.8-255.8)<br>[27.8]      |
| SO <sub>2</sub>    | 2.8 (0.0-40.5)<br>[3.0]         | 2.8 (0.0-40.5)<br>[3.0]         | 2.8 (0.0-40.5)<br>[3.0]         | 2.8 (0.0-40.5)<br>[3.0]         | 2.8 (0.0-40.5)<br>[2.9]         | 2.8 (0.0-40.5)<br>[2.9]         | 2.8 (0.0-40.5)<br>[3.0]         | 2.8 (0.0-40.5)<br>[3.0]         |
| Elemental carbon   | 0.3 (0.0-6.1)<br>[0.5]          |
| Organic compounds  | 0.7 (0.0-8.5)<br>[0.9]          |
| Ammonium particles | 0.8 (0.0-11.0)<br>[1.3]         | 0.8 (0.0-11.0)<br>[1.3]         | 0.8 (0.0-11.0)<br>[1.3]         | 0.8 (0.0-11.0)<br>[1.3]         | 0.8 (0.0-11.0)<br>[1.2]         | 0.8 (0.0-11.0)<br>[1.2]         | 0.8 (0.0-11.0)<br>[1.3]         | 0.8 (0.0-11.0)<br>[1.3]         |
| Dust particles     | 1.5 (0.1-21.5)<br>[1.5]         | 1.5 (0.1-21.5)<br>[1.6]         | 1.5 (0.1-21.5)<br>[1.6]         | 1.5 (0.1-21.5)<br>[1.5]         | 1.4 (0.1-21.5)<br>[1.5]         | 1.4 (0.1-21.5)<br>[1.5]         | 1.5 (0.1-21.5)<br>[1.5]         | 1.5 (0.1-21.5)<br>[1.5]         |
| Sulfate particles  | 1.9 (0.0-27.8)<br>[2.6]         |
| Nitrate particles  | 0.3 (0.0-22.8)<br>[1.2]         |

Abbreviations: CO=carbon monoxide, NO<sub>x</sub>=nitrogen oxides, PM<sub>10</sub>=particulate matter <10 µm in aerodynamic diameter, PM<sub>2.5</sub>=particulate matter <2.5 µm in aerodynamic diameter, SO<sub>2</sub>=sulfur dioxide. <sup>a</sup>The concentrations are presented as median (min-max) [interquartile range] and are in µg/m<sup>3</sup> for PM<sub>10</sub>, PM<sub>2.5</sub>, elemental carbon, organic compounds, and ammonium, sulfate, nitrate and dust particles and in parts per billion for ozone, CO, NO<sub>x</sub>,SO<sub>2</sub>. Concentrations for elemental carbon, organic compounds, and ammonium, sulfate, nitrate and dust particles are based solely on modeled air quality data. Other concentrations are based on modeled data fused with observed air quality data.

Supplemental Table 3. The concentrations of air toxics in the week prior to delivery in the Consortium on Safe Labor.<sup>a</sup>

|                             | Lag (days)             |                        |                        |                        |                        |                        |                        |                        |
|-----------------------------|------------------------|------------------------|------------------------|------------------------|------------------------|------------------------|------------------------|------------------------|
|                             | 0                      | 1                      | 2                      | 3                      | 4                      | 5                      | 6                      | 7                      |
| Acenaphthene                | 3.45*10 <sup>-5</sup>  | 3.44*10 <sup>-5</sup>  | 3.41*10 <sup>-5</sup>  | 3.39*10 <sup>-5</sup>  | 3.38*10 <sup>-5</sup>  | 3.40*10 <sup>-5</sup>  | 3.43*10 <sup>-5</sup>  | 3.45*10 <sup>-5</sup>  |
| Acenaphthylene              | 2.24*10 <sup>-4</sup>  | 2.25*10 <sup>-4</sup>  | 2.25*10 <sup>-4</sup>  | 2.23*10 <sup>-4</sup>  | 2.22*10 <sup>-4</sup>  | 2.23*10 <sup>-4</sup>  | 2.24*10 <sup>-4</sup>  | 2.25*10 <sup>-4</sup>  |
| Anthracene                  | 4.57*10 <sup>-5</sup>  | 4.55*10 <sup>-5</sup>  | 4.54*10 <sup>-5</sup>  | 4.54*10 <sup>-5</sup>  | 4.53*10 <sup>-5</sup>  | 4.52*10 <sup>-5</sup>  | 4.55*10 <sup>-5</sup>  | 4.55*10 <sup>-5</sup>  |
| Benzene                     | 0.322                  | 0.322                  | 0.323                  | 0.321                  | 0.319                  | 0.32                   | 0.321                  | 0.322                  |
| 1,3-butadiene               | 8.02*10 <sup>-3</sup>  | 8.09*10 <sup>-3</sup>  | 8.16*10 <sup>-3</sup>  | 8.17*10 <sup>-3</sup>  | 8.12*10 <sup>-3</sup>  | 8.02*10 <sup>-3</sup>  | 7.96*10 <sup>-3</sup>  | 7.99*10 <sup>-3</sup>  |
| Benz[a]anthracene           | 7.66*10 <sup>-7</sup>  | 7.53*10 <sup>-7</sup>  | 7.40*10 <sup>-7</sup>  | 7.34*10 <sup>-7</sup>  | 7.39*10 <sup>-7</sup>  | 7.52*10 <sup>-7</sup>  | 7.64*10 <sup>-7</sup>  | 7.56*10 <sup>-7</sup>  |
| Benz[a]pyrene               | 9.78*10 <sup>-10</sup> | 1.00*10 <sup>-9</sup>  | 9.36*10 <sup>-10</sup> | 9.43*10 <sup>-10</sup> | 1.01*10 <sup>-9</sup>  | 9.97*10 <sup>-10</sup> | 1.03*10 <sup>-9</sup>  | 1.04*10 <sup>-9</sup>  |
| Ethylbenzene                | 0.136                  | 0.136                  | 0.136                  | 0.135                  | 0.134                  | 0.135                  | 0.135                  | 0.135                  |
| Chrysene                    | 1.22*10 <sup>-5</sup>  | 1.23*10 <sup>-5</sup>  | 1.23*10 <sup>-5</sup>  |
| Cyclohexane                 | 0.0331                 | 0.033                  | 0.033                  | 0.0329                 | 0.0329                 | 0.033                  | 0.033                  | 0.033                  |
| Fluoranthene                | 6.11*10 <sup>-5</sup>  | 6.12*10 <sup>-5</sup>  | 6.10*10 <sup>-5</sup>  | 6.06*10 <sup>-5</sup>  | 6.04*10 <sup>-5</sup>  | 6.07*10 <sup>-5</sup>  | 6.11*10 <sup>-5</sup>  | 6.13*10 <sup>-5</sup>  |
| Fluorene                    | 7.59*10 <sup>-5</sup>  | 7.60*10 <sup>-5</sup>  | 7.56*10 <sup>-5</sup>  | 7.49*10 <sup>-5</sup>  | 7.47*10 <sup>-5</sup>  | 7.52*10 <sup>-5</sup>  | 7.57*10 <sup>-5</sup>  | 7.60*10 <sup>-5</sup>  |
| Indeno[1,2,3-Cd]pyrene      | 3.31*10 <sup>-17</sup> | 3.31*10 <sup>-17</sup> | 3.31*10 <sup>-17</sup> | 3.33*10 <sup>-17</sup> | 3.32*10 <sup>-17</sup> | 3.32*10 <sup>-17</sup> | 3.33*10 <sup>-17</sup> | 3.33*10 <sup>-17</sup> |
| Methyl-tertiary-butyl ether | 0.0175                 | 0.0175                 | 0.0175                 | 0.0174                 | 0.0173                 | 0.0173                 | 0.0173                 | 0.0174                 |
| M-xylene                    | 0.143                  | 0.142                  | 0.143                  | 0.142                  | 0.142                  | 0.142                  | 0.142                  | 0.142                  |
| Naphthalene                 | 8.57*10 <sup>-3</sup>  | 8.58*10 <sup>-3</sup>  | 8.58*10 <sup>-3</sup>  | 8.54*10 <sup>-3</sup>  | 8.54*10 <sup>-3</sup>  | 8.55*10 <sup>-3</sup>  | 8.59*10 <sup>-3</sup>  | 8.57*10 <sup>-3</sup>  |
| N-hexane                    | 0.152                  | 0.151                  | 0.152                  | 0.151                  | 0.15                   | 0.15                   | 0.15                   | 0.151                  |
| Methyl-ethyl ketone         | 0.148                  | 0.148                  | 0.148                  | 0.147                  | 0.146                  | 0.146                  | 0.147                  | 0.147                  |
| O-xylene                    | 0.131                  | 0.132                  | 0.132                  | 0.131                  | 0.131                  | 0.131                  | 0.131                  | 0.131                  |
| Phenanthrene                | 2.56*10 <sup>-4</sup>  | 2.57*10 <sup>-4</sup>  | 2.55*10 <sup>-4</sup>  | 2.54*10 <sup>-4</sup>  | 2.53*10 <sup>-4</sup>  | 2.54*10 <sup>-4</sup>  | 2.56*10 <sup>-4</sup>  | 2.57*10 <sup>-4</sup>  |
| Propene                     | 0.126                  | 0.127                  | 0.127                  | 0.127                  | 0.126                  | 0.126                  | 0.125                  | 0.126                  |
| P-xylene                    | 0.139                  | 0.139                  | 0.139                  | 0.138                  | 0.138                  | 0.138                  | 0.138                  | 0.138                  |
| Pyrene                      | 4.61*10 <sup>-5</sup>  | 4.61*10 <sup>-5</sup>  | 4.60*10 <sup>-5</sup>  | 4.53*10 <sup>-5</sup>  | 4.55*10 <sup>-5</sup>  | 4.57*10 <sup>-5</sup>  | 4.61*10 <sup>-5</sup>  | 4.62*10 <sup>-5</sup>  |
| Sesquiterpene               | 2.35*10 <sup>-6</sup>  | 2.30*10 <sup>-6</sup>  | 2.24*10 <sup>-6</sup>  | 2.17*10 <sup>-6</sup>  | 2.18*10 <sup>-6</sup>  | 2.26*10 <sup>-6</sup>  | 2.36*10 <sup>-6</sup>  | 2.36*10 <sup>-6</sup>  |
| Styrene                     | 1.95*10 <sup>-3</sup>  | 1.96*10 <sup>-3</sup>  | 1.98*10 <sup>-3</sup>  | 1.99*10 <sup>-3</sup>  | 1.97*10 <sup>-3</sup>  | 1.95*10 <sup>-3</sup>  | 1.94*10 <sup>-3</sup>  | 1.94*10 <sup>-3</sup>  |
| Toluene                     | 0.804                  | 0.806                  | 0.807                  | 0.803                  | 0.8                    | 0.802                  | 0.802                  | 0.804                  |

---

<sup>a</sup>The concentrations are presented as the 75th percentile and are based on the full cohort with 223,502 pregnancies. All data are in parts per billion and are based on modeled air quality data.



Supplemental Table 5. Simulated corrected odds ratio of cardiovascular event per interquartile range increase in NO<sub>x</sub> exposure five days prior to delivery (with reported odds ratio of 1.165 with increasing exposure) for a range of prevalence of an unmeasured confounder among women with and without events.

| Prevalence of unmeasured confounder |                         | Odds between the unmeasured confounder and the exposure |              |              |              |              |              |              |              |              |              |              |
|-------------------------------------|-------------------------|---------------------------------------------------------|--------------|--------------|--------------|--------------|--------------|--------------|--------------|--------------|--------------|--------------|
| Pregnancies without events          | Pregnancies with events | 1.05                                                    | 1.1          | 1.2          | 1.3          | 1.4          | 1.5          | 1.6          | 1.7          | 1.8          | 1.9          | 2.0          |
| 0.01                                | 0.05                    | 1.147                                                   | 1.126        | 1.047        | <b>0.969</b> | <b>0.903</b> | <b>0.919</b> | <b>0.875</b> | <b>0.879</b> | <b>0.831</b> | <b>0.873</b> | <b>0.953</b> |
| 0.05                                |                         | 1.168                                                   | 1.170        | 1.186        | 1.169        | 1.197        | 1.184        | 1.216        | 1.206        | 1.222        | 1.263        | 1.253        |
| 0.1                                 |                         | 1.190                                                   | 1.203        | 1.269        | 1.383        | 1.502        | 1.501        | 1.645        | 1.717        | 1.719        | 1.700        | 1.779        |
| 0.2                                 |                         | 1.221                                                   | 1.305        | 1.533        | 1.714        | 1.997        | 2.198        | 2.258        | 2.464        | 2.573        | 2.774        | 2.715        |
| 0.4                                 |                         | 1.301                                                   | 1.479        | 1.883        | 2.332        | 2.804        | 3.036        | 3.209        | 3.801        | 4.217        | 4.512        | 5.120        |
| 0.6                                 |                         | 1.373                                                   | 1.634        | 2.176        | 2.867        | 3.352        | 3.987        | 4.212        | 5.087        | 6.325        | 5.500        | 6.244        |
| 0.8                                 |                         | 1.428                                                   | 1.731        | 2.345        | 3.079        | 3.698        | 4.146        | 4.837        | 6.285        | 5.755        | 7.176        | 8.105        |
| 0.01                                | 0.1                     | 1.127                                                   | 1.073        | <b>0.903</b> | <b>0.744</b> | <b>0.727</b> | <b>0.639</b> | <b>0.601</b> | <b>0.510</b> | <b>0.526</b> | <b>0.556</b> | <b>0.502</b> |
| 0.05                                |                         | 1.148                                                   | 1.114        | 1.044        | <b>0.956</b> | <b>0.993</b> | <b>0.886</b> | <b>0.858</b> | <b>0.789</b> | <b>0.838</b> | <b>0.824</b> | <b>0.814</b> |
| 0.1                                 |                         | 1.171                                                   | 1.164        | 1.130        | 1.146        | 1.153        | 1.093        | 1.116        | 1.220        | 1.121        | 1.152        | 1.160        |
| 0.2                                 |                         | 1.206                                                   | 1.270        | 1.364        | 1.425        | 1.555        | 1.543        | 1.688        | 1.867        | 1.761        | 1.766        | 1.854        |
| 0.4                                 |                         | 1.278                                                   | 1.425        | 1.707        | 1.874        | 2.173        | 2.339        | 2.432        | 2.567        | 2.607        | 2.638        | 2.850        |
| 0.6                                 |                         | 1.338                                                   | 1.563        | 1.961        | 2.336        | 2.350        | 2.777        | 2.883        | 2.817        | 3.016        | 3.172        | 3.189        |
| 0.8                                 |                         | 1.419                                                   | 1.639        | 2.195        | 2.542        | 2.653        | 2.774        | 3.108        | 3.342        | 3.217        | 3.431        | 3.556        |
| 0.01                                | 0.2                     | 1.093                                                   | <b>0.984</b> | <b>0.761</b> | <b>0.594</b> | <b>0.459</b> | <b>0.344</b> | <b>0.310</b> | <b>0.262</b> | <b>0.246</b> | <b>0.204</b> | <b>0.207</b> |
| 0.05                                |                         | 1.114                                                   | 1.040        | <b>0.857</b> | <b>0.767</b> | <b>0.662</b> | <b>0.569</b> | <b>0.515</b> | <b>0.443</b> | <b>0.344</b> | <b>0.342</b> | <b>0.286</b> |
| 0.1                                 |                         | 1.117                                                   | 1.075        | <b>0.949</b> | <b>0.900</b> | <b>0.780</b> | <b>0.794</b> | <b>0.721</b> | <b>0.653</b> | <b>0.640</b> | <b>0.588</b> | <b>0.573</b> |
| 0.2                                 |                         | 1.174                                                   | 1.164        | 1.181        | 1.141        | 1.092        | 1.104        | 1.116        | 1.118        | 1.172        | 1.072        | 1.127        |
| 0.4                                 |                         | 1.236                                                   | 1.329        | 1.410        | 1.511        | 1.519        | 1.560        | 1.567        | 1.657        | 1.799        | 1.715        | 1.693        |
| 0.6                                 |                         | 1.298                                                   | 1.393        | 1.688        | 1.867        | 1.780        | 1.973        | 1.925        | 2.036        | 1.969        | 2.088        | 1.969        |
| 0.8                                 |                         | 1.361                                                   | 1.508        | 1.889        | 1.987        | 2.050        | 2.180        | 2.129        | 2.229        | 2.212        | 2.299        | 2.218        |
| 0.01                                | 0.4                     | 1.033                                                   | <b>0.880</b> | <b>0.638</b> | <b>0.434</b> | <b>0.314</b> | <b>0.263</b> | <b>0.186</b> | <b>0.155</b> | <b>0.134</b> | <b>0.113</b> | <b>0.106</b> |
| 0.05                                |                         | 1.028                                                   | <b>0.927</b> | <b>0.702</b> | <b>0.562</b> | <b>0.410</b> | <b>0.306</b> | <b>0.249</b> | <b>0.199</b> | <b>0.164</b> | <b>0.147</b> | <b>0.124</b> |
| 0.1                                 |                         | 1.056                                                   | <b>0.959</b> | <b>0.771</b> | <b>0.662</b> | <b>0.535</b> | <b>0.454</b> | <b>0.376</b> | <b>0.309</b> | <b>0.260</b> | <b>0.231</b> | <b>0.200</b> |
| 0.2                                 |                         | 1.093                                                   | 1.024        | <b>0.927</b> | <b>0.804</b> | <b>0.771</b> | <b>0.734</b> | <b>0.652</b> | <b>0.593</b> | <b>0.550</b> | <b>0.509</b> | <b>0.475</b> |
| 0.4                                 |                         | 1.170                                                   | 1.174        | 1.145        | 1.179        | 1.144        | 1.142        | 1.102        | 1.087        | 1.065        | 1.102        | 1.050        |

|      |      |              |              |              |              |              |              |              |              |              |              |              |
|------|------|--------------|--------------|--------------|--------------|--------------|--------------|--------------|--------------|--------------|--------------|--------------|
| 0.6  |      | 1.224        | 1.279        | 1.313        | 1.387        | 1.410        | 1.355        | 1.446        | 1.400        | 1.427        | 1.418        | 1.411        |
| 0.8  |      | 1.278        | 1.374        | 1.416        | 1.517        | 1.542        | 1.545        | 1.601        | 1.585        | 1.598        | 1.566        | 1.617        |
| 0.01 |      | <b>0.945</b> | <b>0.808</b> | <b>0.525</b> | <b>0.373</b> | <b>0.247</b> | <b>0.203</b> | <b>0.134</b> | <b>0.112</b> | <b>0.103</b> | <b>0.088</b> | <b>0.086</b> |
| 0.05 |      | 1.001        | <b>0.833</b> | <b>0.625</b> | <b>0.454</b> | <b>0.340</b> | <b>0.255</b> | <b>0.186</b> | <b>0.153</b> | <b>0.124</b> | <b>0.099</b> | <b>0.090</b> |
| 0.1  |      | 1.018        | <b>0.869</b> | <b>0.669</b> | <b>0.532</b> | <b>0.428</b> | <b>0.342</b> | <b>0.279</b> | <b>0.236</b> | <b>0.177</b> | <b>0.154</b> | <b>0.115</b> |
| 0.2  | 0.6  | 1.039        | <b>0.938</b> | <b>0.790</b> | <b>0.711</b> | <b>0.593</b> | <b>0.542</b> | <b>0.472</b> | <b>0.407</b> | <b>0.369</b> | <b>0.312</b> | <b>0.284</b> |
| 0.4  |      | 1.106        | 1.063        | 1.000        | <b>0.953</b> | <b>0.921</b> | <b>0.893</b> | <b>0.890</b> | <b>0.827</b> | <b>0.843</b> | <b>0.814</b> | <b>0.821</b> |
| 0.6  |      | 1.170        | 1.152        | 1.151        | 1.169        | 1.132        | 1.160        | 1.154        | 1.121        | 1.100        | 1.107        | 1.121        |
| 0.8  |      | 1.214        | 1.252        | 1.286        | 1.280        | 1.271        | 1.285        | 1.309        | 1.343        | 1.335        | 1.308        | 1.328        |
| 0.01 |      | <b>0.930</b> | <b>0.758</b> | <b>0.472</b> | <b>0.309</b> | <b>0.225</b> | <b>0.169</b> | <b>0.115</b> | <b>0.090</b> | <b>0.087</b> | <b>0.084</b> | <b>0.056</b> |
| 0.05 |      | <b>0.946</b> | <b>0.789</b> | <b>0.562</b> | <b>0.383</b> | <b>0.288</b> | <b>0.209</b> | <b>0.161</b> | <b>0.131</b> | <b>0.109</b> | <b>0.087</b> | <b>0.074</b> |
| 0.1  |      | <b>0.962</b> | <b>0.813</b> | <b>0.601</b> | <b>0.467</b> | <b>0.361</b> | <b>0.285</b> | <b>0.225</b> | <b>0.175</b> | <b>0.137</b> | <b>0.118</b> | <b>0.100</b> |
| 0.2  | 0.8  | <b>0.996</b> | <b>0.869</b> | <b>0.709</b> | <b>0.599</b> | <b>0.514</b> | <b>0.438</b> | <b>0.373</b> | <b>0.330</b> | <b>0.269</b> | <b>0.242</b> | <b>0.206</b> |
| 0.4  |      | 1.057        | <b>0.980</b> | <b>0.894</b> | <b>0.834</b> | <b>0.784</b> | <b>0.754</b> | <b>0.712</b> | <b>0.695</b> | <b>0.659</b> | <b>0.657</b> | <b>0.617</b> |
| 0.6  |      | 1.111        | 1.075        | 1.035        | 1.010        | <b>0.993</b> | <b>0.992</b> | <b>0.974</b> | <b>0.990</b> | <b>0.969</b> | <b>0.978</b> | <b>0.962</b> |
| 0.8  |      | 1.160        | 1.154        | 1.166        | 1.163        | 1.163        | 1.166        | 1.159        | 1.161        | 1.145        | 1.155        | 1.148        |
| 0.01 |      | <b>0.878</b> | <b>0.708</b> | <b>0.465</b> | <b>0.307</b> | <b>0.218</b> | <b>0.157</b> | <b>0.124</b> | <b>0.097</b> | <b>0.085</b> | <b>0.060</b> | <b>0.067</b> |
| 0.05 |      | <b>0.916</b> | <b>0.744</b> | <b>0.507</b> | <b>0.361</b> | <b>0.259</b> | <b>0.191</b> | <b>0.154</b> | <b>0.123</b> | <b>0.096</b> | <b>0.085</b> | <b>0.075</b> |
| 0.1  |      | <b>0.938</b> | <b>0.766</b> | <b>0.565</b> | <b>0.425</b> | <b>0.320</b> | <b>0.255</b> | <b>0.193</b> | <b>0.160</b> | <b>0.134</b> | <b>0.104</b> | <b>0.088</b> |
| 0.2  | 0.95 | <b>0.975</b> | <b>0.846</b> | <b>0.653</b> | <b>0.547</b> | <b>0.461</b> | <b>0.390</b> | <b>0.332</b> | <b>0.275</b> | <b>0.233</b> | <b>0.199</b> | <b>0.169</b> |
| 0.4  |      | 1.034        | <b>0.938</b> | <b>0.834</b> | <b>0.766</b> | <b>0.715</b> | <b>0.676</b> | <b>0.641</b> | <b>0.610</b> | <b>0.583</b> | <b>0.558</b> | <b>0.536</b> |
| 0.6  |      | 1.079        | 1.028        | <b>0.974</b> | <b>0.936</b> | <b>0.910</b> | <b>0.901</b> | <b>0.887</b> | <b>0.892</b> | <b>0.880</b> | <b>0.865</b> | <b>0.851</b> |
| 0.8  |      | 1.130        | 1.112        | 1.089        | 1.076        | 1.080        | 1.075        | 1.065        | 1.061        | 1.062        | 1.057        | 1.064        |
